# Supplementary material
Source: Springer Nature journal article supplement (https://www.springermedizin.de/resource/supplementary/12985_2014_2411_MOESM2_ESM.pdf/9607040)

### H5N2 LP antigen

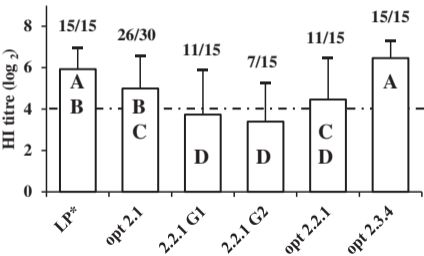

( $p < 0.0001$ )

### H5N2 LP antigen

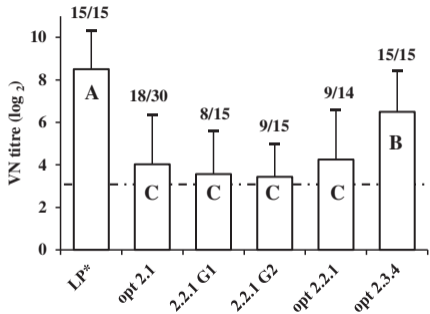

( $p < 0.0001$ )

Supplement: MOESM2 [file 9607040]
